# Supplementary material for: Analysis of Centranthera grandiflora Benth Transcriptome Explores Genes of Catalpol, Acteoside and Azafrin Biosynthesis
Source: MDPI journal article supplement (doi:10.3390/ijms20236034), 2019-11-29
Supplement: s1 [file s1]

## Supplementary Figures:

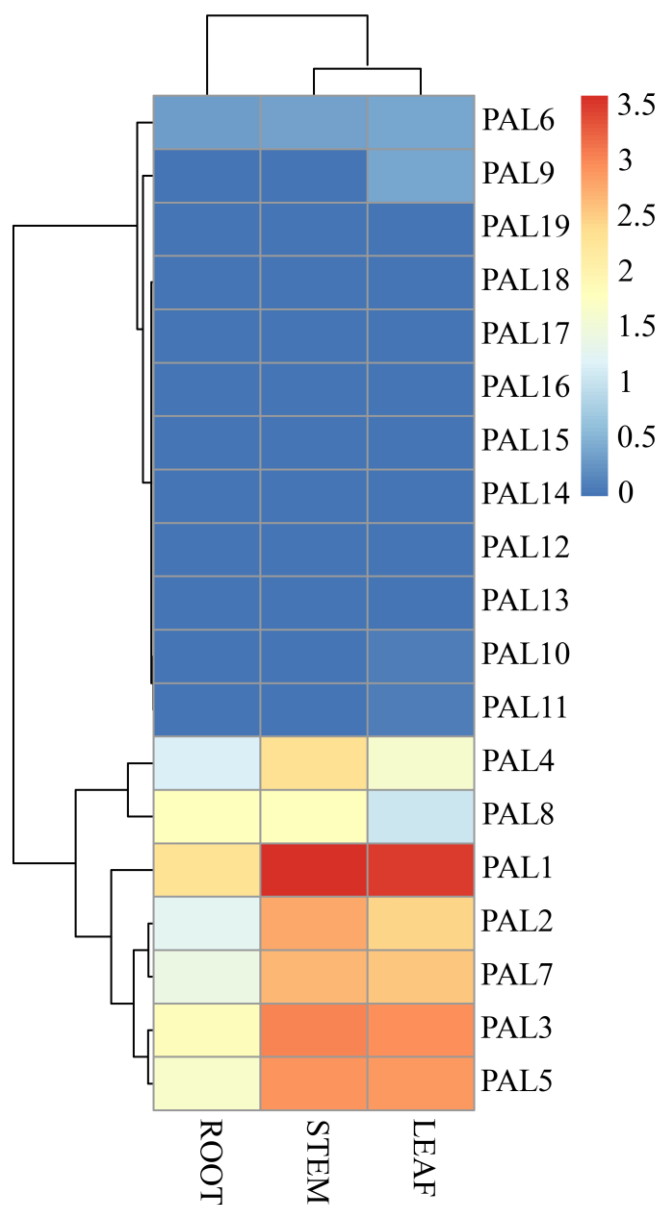

**Figure S1.** Expression of PAL genes in the putative pathway of acteoside biosynthesis across three tissues in *C. grandiflora* benth. The expression level is the sum of all the unigenes for each gene, and  $\log_{10}(\text{sum}(\text{FPKM})+1)$  was used to plot the heatmap. Candidate PAL unigenes were selected according to the annotation. Abbreviation: PAL, phenylalanine ammonia-lyase.

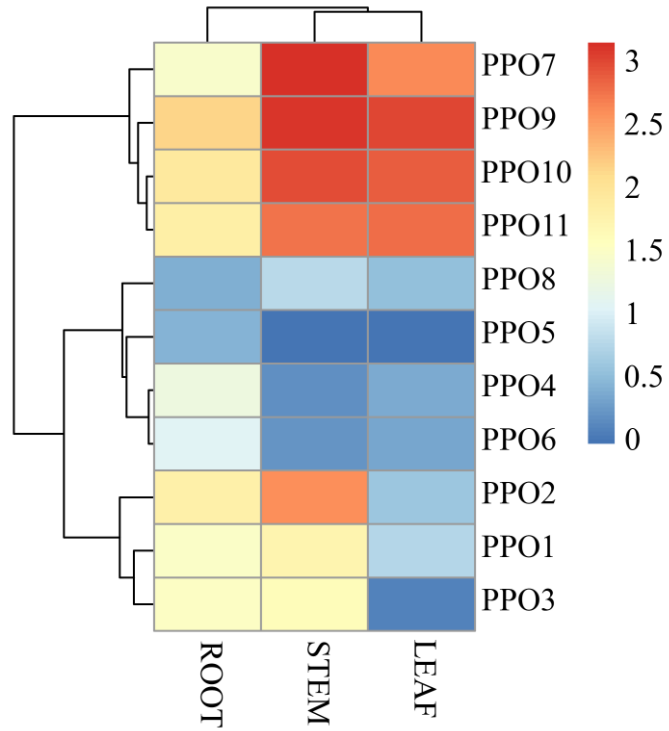

**Figure S2.** Expression of *PPO* genes in the putative pathway of acteoside biosynthesis across three tissues in *C. grandiflora* benth. The expression level is the sum of all the unigenes for each gene, and  $\log_{10}(\text{sum}(\text{FPKM})+1)$  was used to plot the heatmap. Candidate *PAL* unigenes were selected according to the annotation. Abbreviation: PPO, polyphenol oxidase.

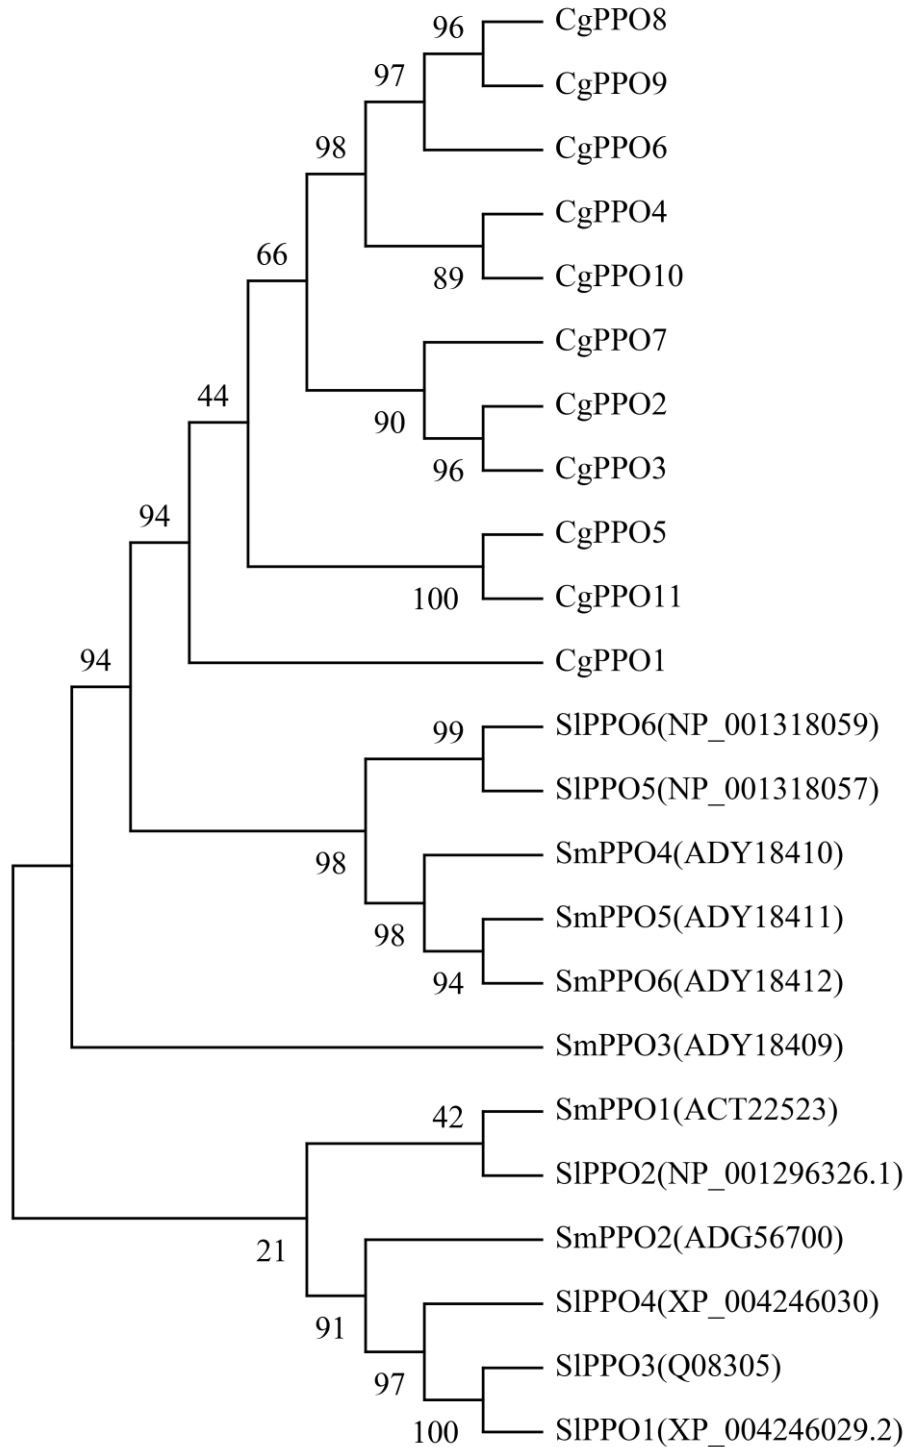

**Figure S3.** Phylogenetic analysis and expression level of PPOs from *C. grandiflora* Benth. Amino acid sequences were aligned using the ClustalX2 program, and evolutionary distances were calculated using phyML software with the Maximum Likelihood statistical method.

**Note: Supplementary tables S1-S14 are too big (277 Mb) to upload at present.**

Now the fourteen tables are uploaded into Zenodo website, please download them using this link:

<https://zenodo.org/record/3408408#.XdYpF9OTccB>

You can find in the website:

November 21, 2019

Journal article Open Access

# Analysis of *Centranthera grandiflora* benth Transcriptome Explores Genes of Catalpol, Acteoside and Azafrin Biosynthesis

Zhang, Xiaodong

Supplementary tables for the article "Analysis of *Centranthera grandiflora* benth Transcriptome Explores Genes of Catalpol, Acteoside and Azafrin Biosynthesis" in International Journal of Molecular Sciences.

Files (289.9 MB)

| Name                                     | Size     |                          |
|------------------------------------------|----------|--------------------------|
| <a href="#">Supplementary tables.rar</a> | 289.9 MB | <a href="#">Download</a> |

md5:a3525ba39cbb9f6f9601da50876bc4ca

**Beta** Citations 0

Show only:  Literature (0)  Dataset (0)  Software (0)  Unknown (0)

Citations to this version

Search

0 views 0 downloads

[See more details...](#)

Indexed in



**Publication date:**  
November 21, 2019

**DOI:**  
DOI [10.5281/zenodo.3408408](https://doi.org/10.5281/zenodo.3408408)

**Keyword(s):**  
Centranthera grandiflora benth; transcriptome; catalpol biosynthesis; acteoside biosynthesis; azafrin biosynthesis

**License (for files):**  
[Creative Commons Attribution 4.0 International](#)
